# Supplementary material
Source: publisher figshare collection journal article supplement (https://acs.figshare.com/ndownloader/files/3922930)
Supplement: Supplementary file 1 [file 3922930]

## Solvent Dependent Formation of Metallogels and Single-Crystal MOFs by La(III) and Ce(III) Connectors and 3,5-Pyridinedicarboxylate

Goutam Nandi\*, Hatem M. Titi, Ranjit Thakuria and Israel Goldberg\*

School of Chemistry, Sackler Faculty of Exact Sciences, Tel-Aviv University, Ramat-Aviv, 69978 Tel-Aviv, Israel. E-mail addresses: [gtm.nnd@gmail.com](mailto:gtm.nnd@gmail.com) [goldberg@post.tau.ac.il](mailto:goldberg@post.tau.ac.il)

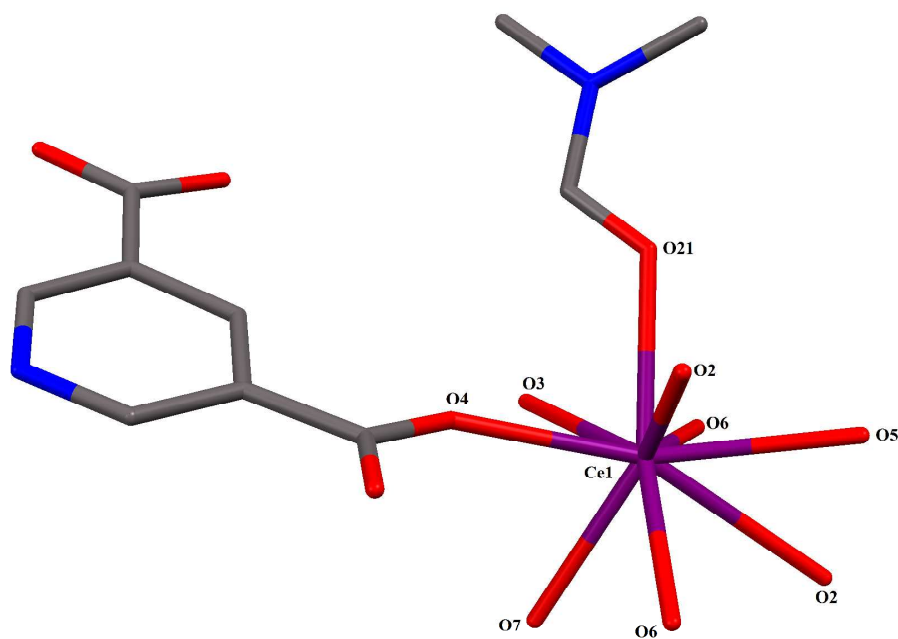

**Figure S1** Coordination environment of Ce(III) ion (Hydrogen atoms are omitted for clarity). All the metal-coordinated O-sites (except for O21) are of the six surrounding 3,5-PDC linkers.

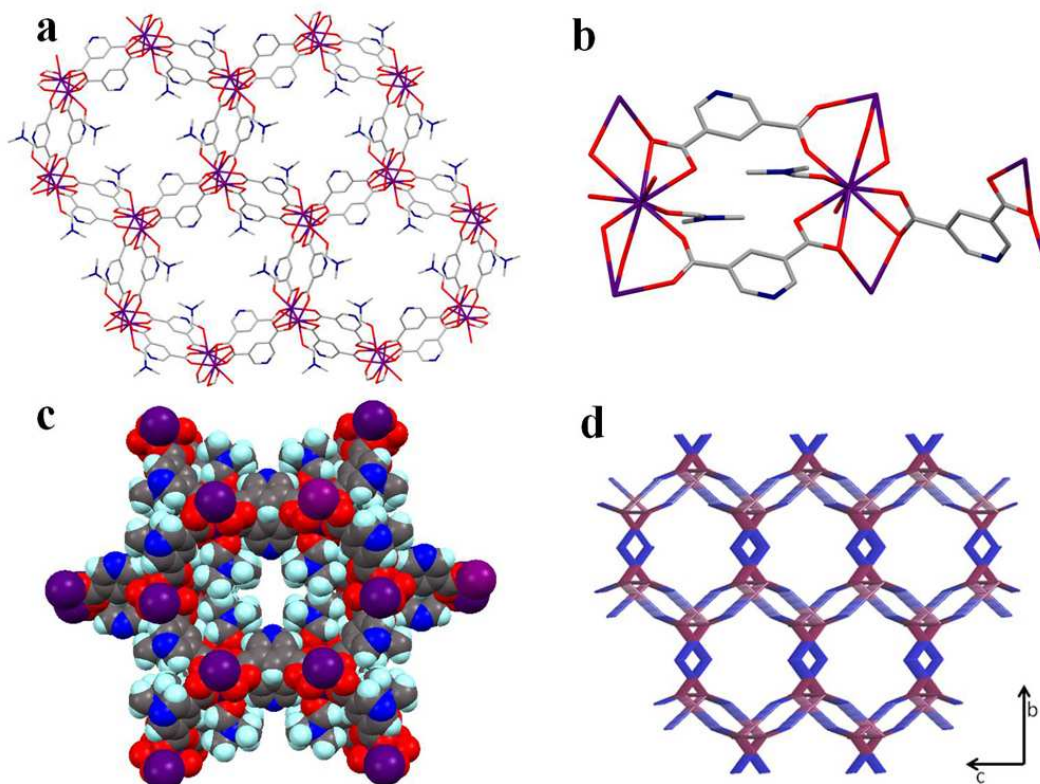

**Figure S2** (a) Packing of **2** showing the hexagonal channel (down the *a*-axis). (b) The bridging between the two metal centers with their coordination environments. (c) View of the hexagonal channel formed by **2** in space-fill model, which is lined by the metal-coordinated DMF ligand and the pyridyl-N sites. (d) Simplified (node and linker) framework structure of metal complex **2** (purple = metal cluster, blue = ligand).

**Table S1** Crystallographic and refinement data.

|                  | <b>[La(III)(3,5-PDC)<sub>1.5</sub>(DMF)]<sub>x</sub>DMF</b><br><b>1</b>        | <b>[Ce(III)(3,5-PDC)<sub>1.5</sub>(DMF)]<sub>x</sub>DMF</b><br><b>2</b>        |
|------------------|--------------------------------------------------------------------------------|--------------------------------------------------------------------------------|
| Chemical formula | C <sub>27</sub> H <sub>23</sub> La <sub>2</sub> N <sub>5</sub> O <sub>14</sub> | C <sub>27</sub> H <sub>23</sub> Ce <sub>2</sub> N <sub>5</sub> O <sub>14</sub> |
| Formula weight   | 919.32                                                                         | 921.74                                                                         |
| Crystal system   | Orthorhombic                                                                   | Orthorhombic                                                                   |
| Space group      | <i>Pnma</i>                                                                    | <i>Pnma</i>                                                                    |
| T/K              | 110(2)                                                                         | 110(2)                                                                         |

|                                       |             |             |
|---------------------------------------|-------------|-------------|
| a/Å                                   | 8.1241(3)   | 8.1162(4)   |
| b/ Å                                  | 30.3843(10) | 30.2842(14) |
| c/ Å                                  | 15.6616(5)  | 15.6709(7)  |
| $\alpha$ /°                           | 90          | 90          |
| $\beta$ /°                            | 90          | 90          |
| $\gamma$ /°                           | 90          | 90          |
| Z                                     | 4           | 4           |
| V/ Å <sup>3</sup>                     | 3866.0(2)   | 3851.8(3)   |
| D <sub>calc</sub> /g cm <sup>-3</sup> | 1.579       | 1.589       |
| $\mu$ /mm <sup>-1</sup>               | 2.243       | 2.397       |
| Reflns collected                      | 24239       | 15168       |
| Unique reflns                         | 3262        | 2869        |
| R1[I > 2(I)]                          | 0.0434      | 0.0401      |
| wR2 (all)                             | 0.1085      | 0.1004      |
| Goodness-of-fit                       | 1.080       | 1.087       |
| CCDC No.                              | 979166      | 979167      |

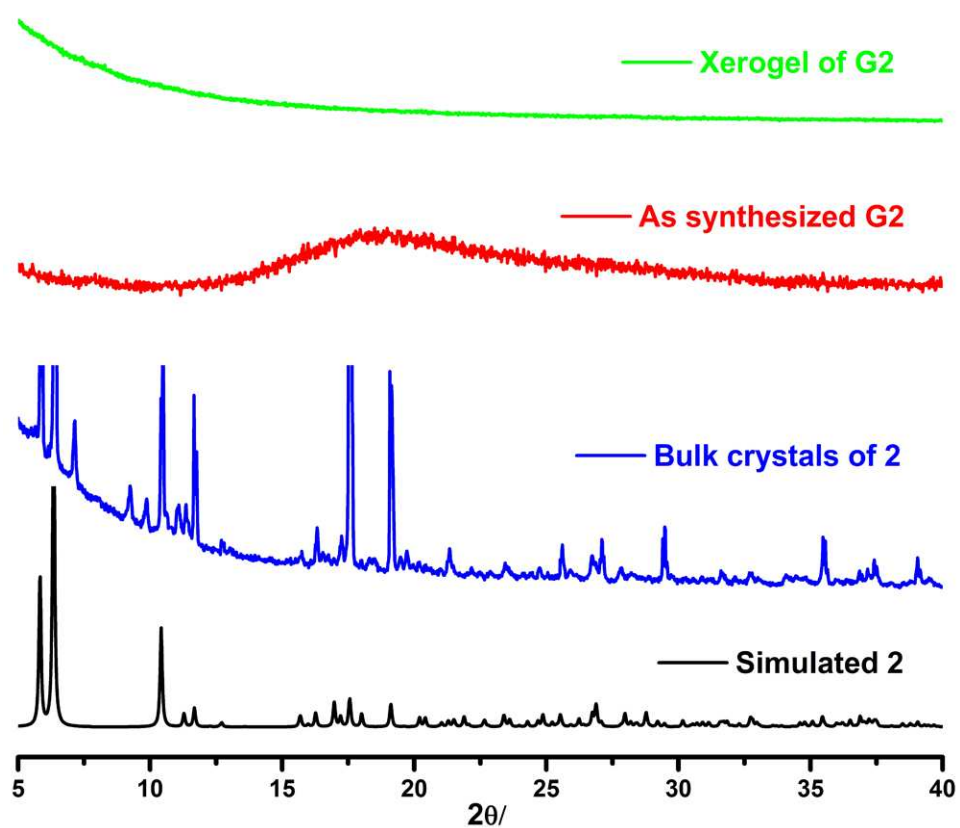

**Figure S3** PXRD of as synthesized **G2** and xerogel of **G2** along with the simulated and experimental powder pattern of **2**.

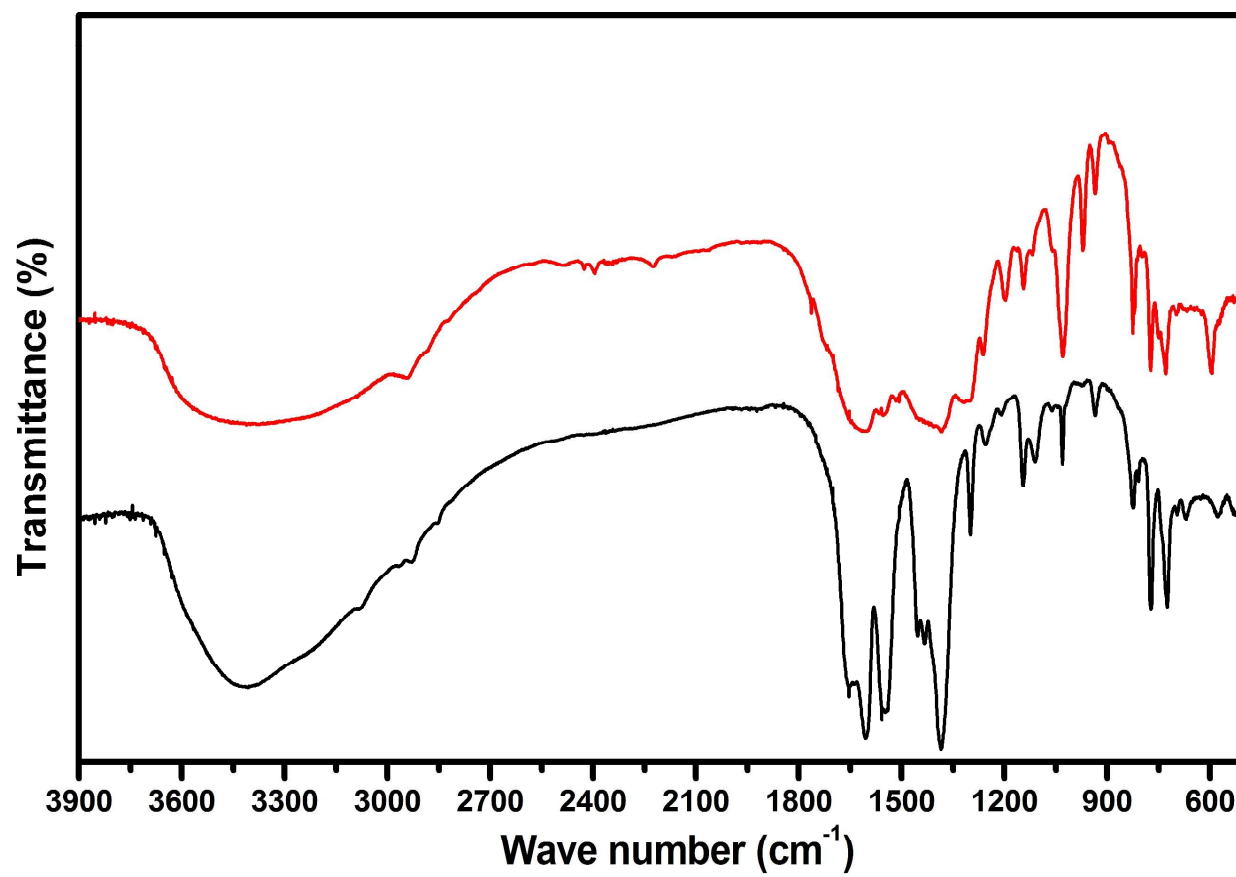

**Figure S4** Comparison of FT-IR spectra of xerogel of **G1** (red) and bulk crystals of **1** (black).

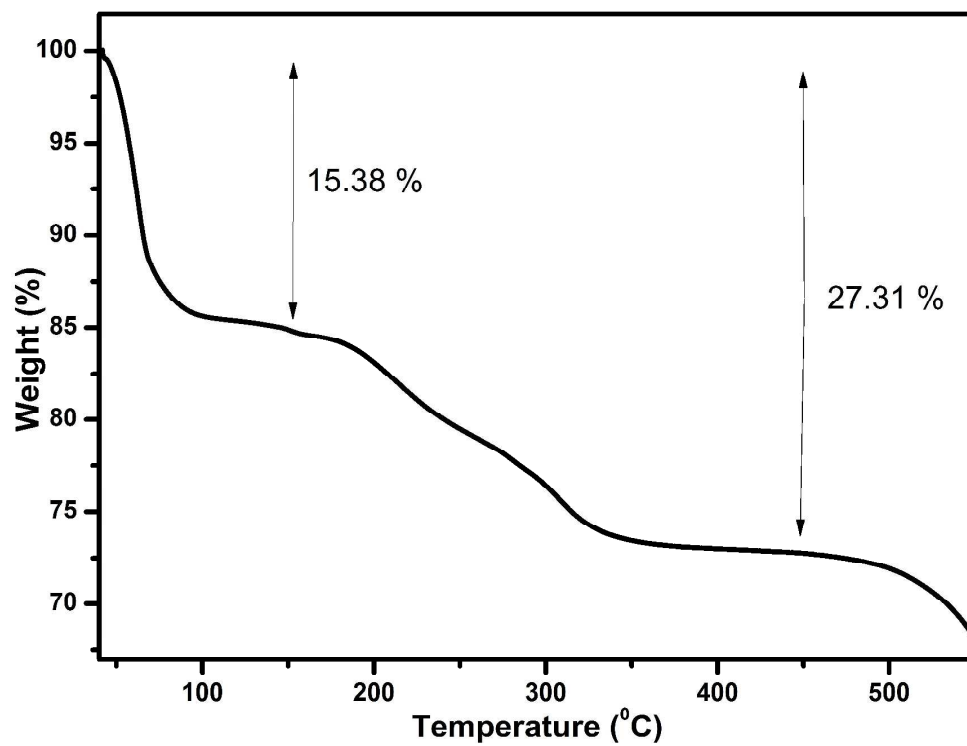

Figure S5 TGA of 1

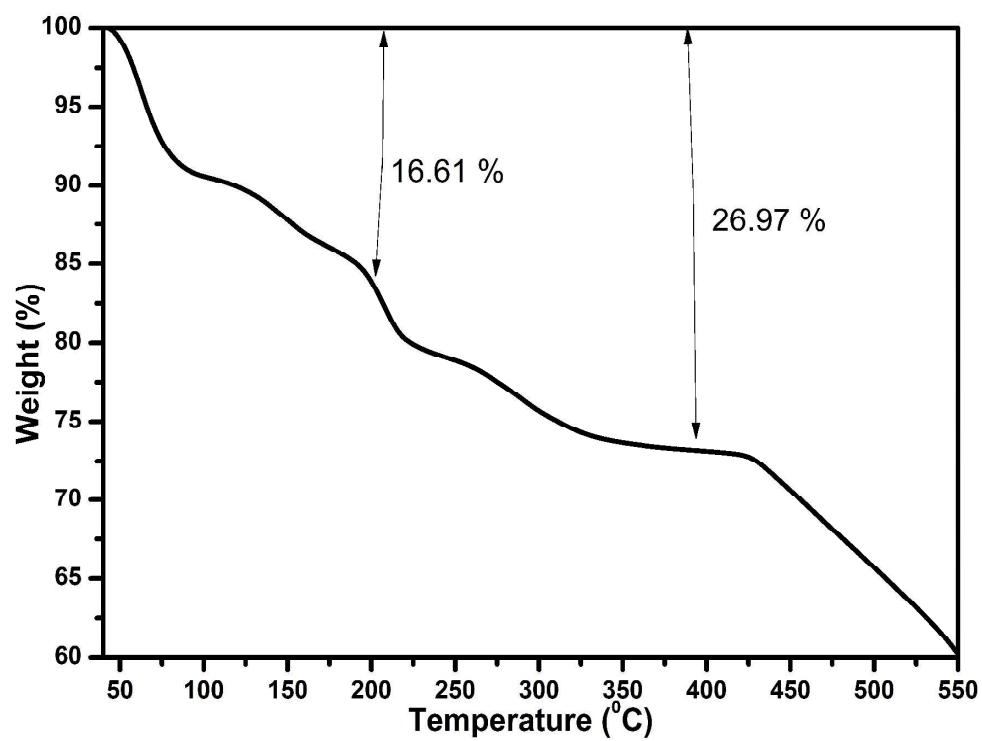

Figure S6 TGA of 2
